# Supplementary material for: Design, Synthesis and Characterization of [G10a]-Temporin SHa Dendrimers as Dual Inhibitors of Cancer and Pathogenic Microbes
Source: MDPI journal article supplement (doi:10.3390/biom12060770), 2022-05-31
Supplement: s1 [file s1]

# Design, Synthesis and Characterization of [G10a]-Temporin SHa Dendrimers as Dual Inhibitors of Cancer and Pathogenic Microbes

Arif Iftikhar Khan <sup>1,2</sup>, Shahzad Nazir <sup>1,2</sup>, Aaqib Ullah <sup>1,2</sup>, Muhammad Nadeem ul Haque <sup>1,2</sup>, Rukesh Maharjan <sup>2</sup>, Shabana U. Simjee <sup>2,3</sup>, Hamza Olleik <sup>4</sup>, Elise Courvoisier-Dezord <sup>4</sup>, Marc Maresca <sup>4,\*</sup> and Farzana Shaheen <sup>1,2,\*</sup>

<sup>1</sup> Third World Center for Science and Technology, International Center for Chemical and Biological Sciences, University of Karachi, Karachi 75270, Pakistan;

<sup>2</sup> H. E. J. Research Institute of Chemistry, International Center for Chemical and Biological Sciences, University of Karachi, Karachi 75270, Pakistan; khanformanite@gmail.com (A.I.K.); nazirshahzad39@gmail.com (S.N.); aqibafridi209@gmail.com (A.U.); nadeem.and.chem@gmail.com (M.N.u.H.); rukeshmaharjan2013@gmail.com (R.M.);

<sup>3</sup> Dr. Panjwani Center for Molecular Medicine and Drug Research, International Center for Chemical and Biological Sciences, University of Karachi, Karachi 75270, Pakistan. shabana.simjee@iccs.edu (S.U.S.)

<sup>4</sup> Aix-Marseille Univ, CNRS, Centrale Marseille, iSm2, 13013 Marseille, France; hamza.olleik@live.com (H.O.); elise.courvoisier-dezord@univ-amu.fr (E.C.-D.)

\* Correspondence: m.maresca@univ-amu.fr (M.M.); afnan.iccs@gmail.com (F.S.);  
Tel.: +33-0413945609 (M.M.); +92-3313859073 (F.S.)

## Table of Contents

| Figure No. | Content                                                                                                                              | Page No. |
|------------|--------------------------------------------------------------------------------------------------------------------------------------|----------|
| S1         | UPLC Profile of Temporin- SHa peptide, [G10a]-SHa Peptide and its Dendrimers three in ACN:H <sub>2</sub> O:TFA::60:40:0.08 at 215 nm | 3-4      |
| S2         | Composition of Temporin SHa Peptide and its analogs                                                                                  | 4        |
| S3         | Structure of Temporin-SHa Peptide                                                                                                    | 5        |
| S4         | Synthetic scheme of Temporin-SHa Peptide                                                                                             | 6        |
| S5         | MALDI spectrum of Temporin-SHa                                                                                                       | 7        |
| S6         | <sup>1</sup> H-NMR of Temporin-SHa                                                                                                   | 8        |
| S7         | NMR Data of Temporin-SHa in d <sub>6</sub> DMSO                                                                                      | 9-10     |
| S8         | Structure of [G10a]-SHa Peptide                                                                                                      | 11       |
| S9         | Synthetic scheme of [G10a]SHa                                                                                                        | 12       |
| S10        | ESIMS (Low Resolution Positive Mode) of [G10a]SHa                                                                                    | 13       |
| S11        | <sup>1</sup> H-NMR of [G10a]-SHa Peptide                                                                                             | 14       |
| S12        | NMR Data of [G10a] SHa in d <sub>6</sub> DMSO                                                                                        | 14-17    |
| S13        | Structure of [G10a] <sub>2</sub> -SHa Dendrimer                                                                                      | 18       |
| S14        | Synthetic scheme of [G10a] <sub>2</sub> SHa                                                                                          | 19       |
| S15        | HPLC profile of [G10a] <sub>2</sub> -SHa                                                                                             | 20       |
| S16        | ESIMS (Low Resolution Positive Mode) of [G10a] <sub>2</sub> SHa                                                                      | 20       |
| S17        | <sup>1</sup> H-NMR of [G10a] <sub>2</sub> -SHa Peptide                                                                               | 21       |
| S18        | Structure of Jeff-[G10a] <sub>2</sub> -SHa Dendrimer                                                                                 | 22       |
| S19        | Synthetic scheme of Jeff-[G10a] <sub>2</sub> SHa                                                                                     | 23       |

|     |                                                                      |       |
|-----|----------------------------------------------------------------------|-------|
| S20 | HPLC profile of Jeff-[G10a] <sub>2</sub> SHa                         | 24    |
| S21 | ESIMS (Low Resolution Positive Mode) of Jeff-[G10a] <sub>2</sub> SHa | 25    |
| S22 | <sup>1</sup> H-NMR of Jeff-[G10a] <sub>2</sub> -SHa Peptide          | 26    |
| S23 | Structure of [G10a] <sub>3</sub> -SHa Dendrimer                      | 27    |
| S24 | Synthetic scheme of [G10a] <sub>3</sub> SHa                          | 28-29 |
| S25 | HPLC profile of [G10a] <sub>3</sub> SHa                              | 30    |
| S26 | ESIMS (Low Resolution Positive Mode) of [G10a] <sub>3</sub> SHa      | 31    |
| S27 | <sup>1</sup> H-NMR of [G10a] <sub>3</sub> -SHa Peptide               | 32    |
| S28 | IR spectra of dendrimer peptides                                     | 33    |
| S29 | UV-Visible spectra of dendrimer peptides                             | 34    |

| Peptide Dendrimers | UPLC Profile of Temporin-SHa and its analogs in ACN:H <sub>2</sub> O:TFA::60:40:0.08 at 215 nm                                                                                                           |
|--------------------|----------------------------------------------------------------------------------------------------------------------------------------------------------------------------------------------------------|
| 1                  | 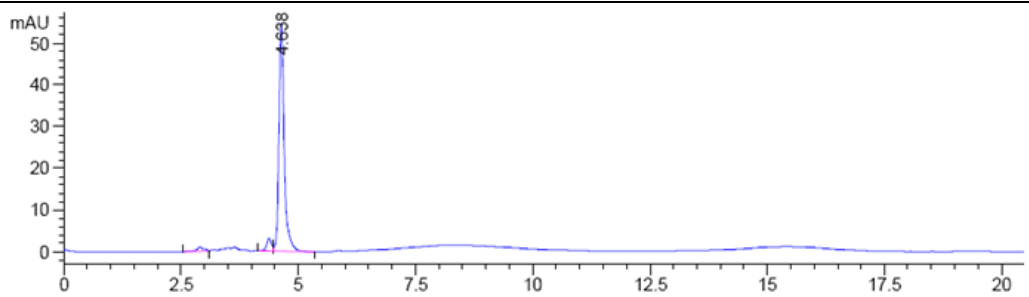 <p>UPLC Profile of Temporin-SHa. C4 reversed-phase analytical column, ACN/H<sub>2</sub>O/TFA 60 % /40 % / 0.08 %</p> |
| 2                  |  <p>UPLC Profile of [G10a] SHa. C4 reversed-phase analytical column, ACN/H<sub>2</sub>O/TFA 60 % /40 % / 0.082 %</p> |

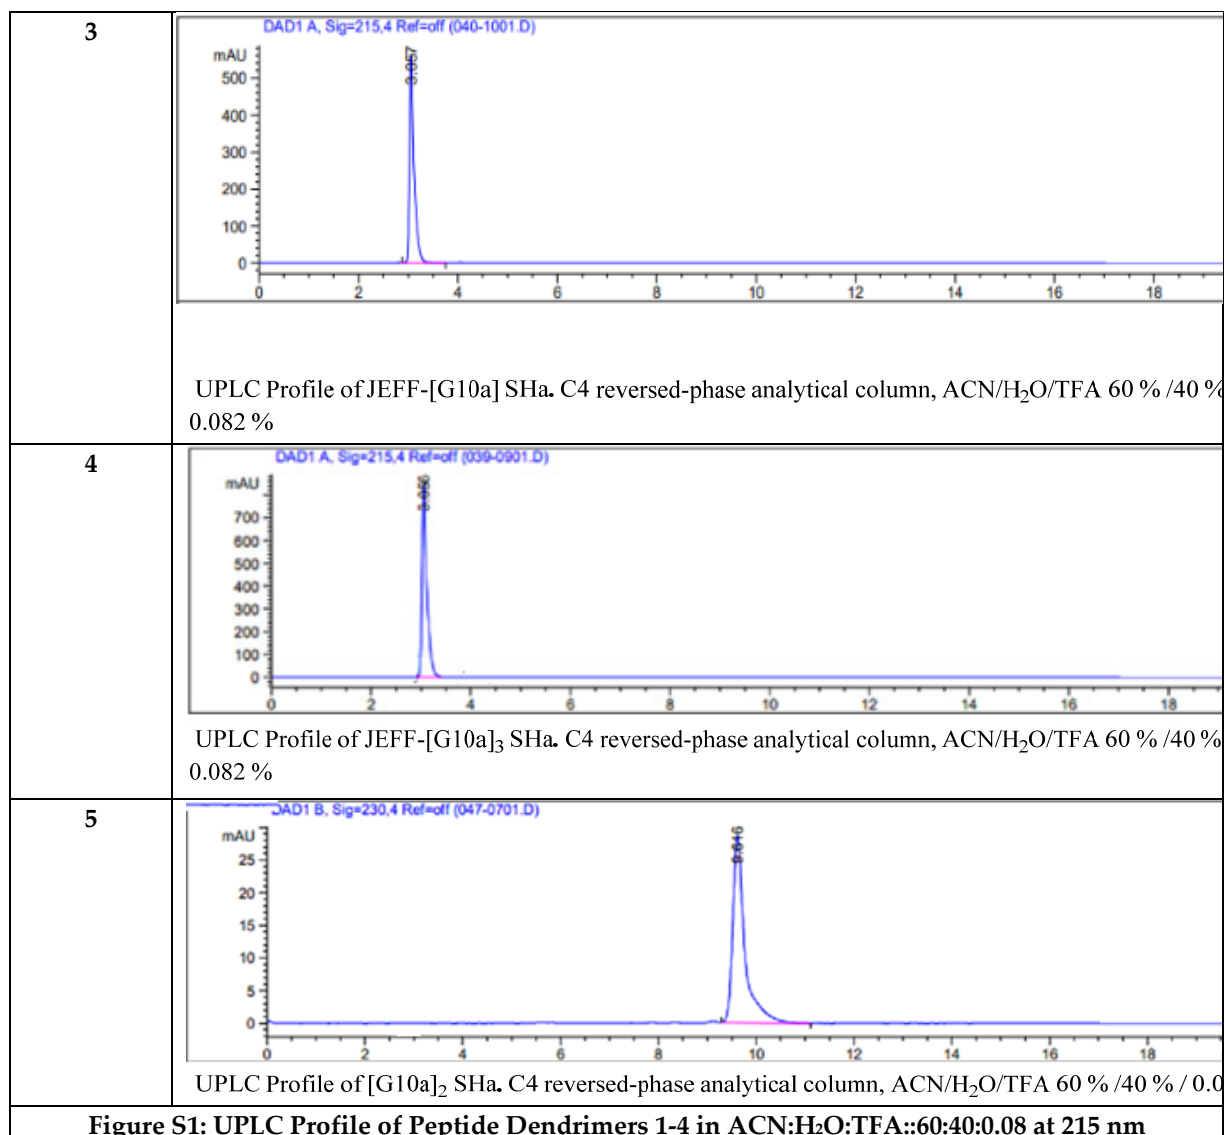

| SEQ NO       | AA <sub>1</sub>                                                                                              | AA <sub>2</sub>                                             |
|--------------|--------------------------------------------------------------------------------------------------------------|-------------------------------------------------------------|
| SEQ ID NO: 1 | R <sup>4</sup> = R <sup>7</sup> = R <sup>10</sup> Gly,                                                       | -                                                           |
| SEQ ID NO: 2 | R <sup>4</sup> = R <sup>7</sup> = Gly,                                                                       | R <sup>10</sup> = D-Ala                                     |
| SEQ ID NO: 3 | R <sup>4</sup> = R <sup>7</sup> = R <sup>17</sup> = R <sup>20</sup> Gly,                                     | R <sup>10</sup> = R <sup>23</sup> = D-Ala                   |
| SEQ ID NO: 4 | JEFF-R <sup>4</sup> = R <sup>7</sup> = R <sup>17</sup> = R <sup>20</sup> Gly,                                | R <sup>10</sup> = R <sup>23</sup> = D-Ala                   |
| SEQ ID NO: 5 | R <sup>4</sup> = R <sup>7</sup> = R <sup>17</sup> = R <sup>20</sup> R <sup>30</sup> = R <sup>33</sup> = Gly, | R <sup>10</sup> = R <sup>23</sup> = R <sup>36</sup> = D-Ala |

**Figure-S2:** Composition of Temporin-SHa Peptide and its analogs

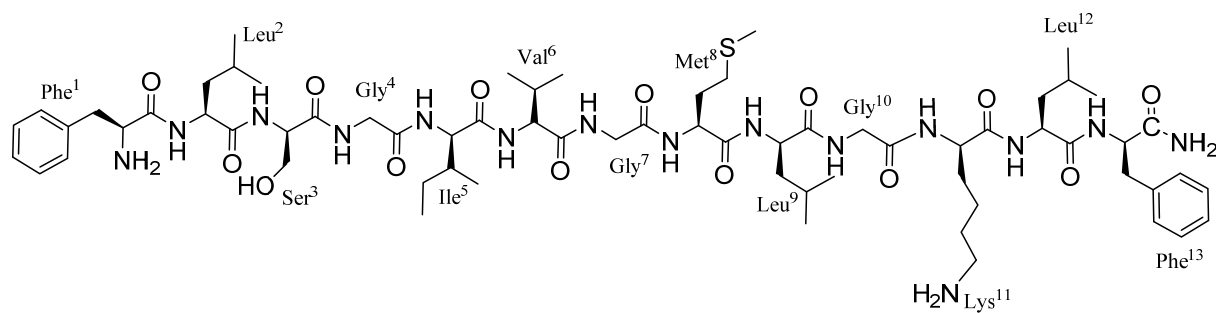

**FigureS3:** Structure of Temporin-SHa.

## Temporin SHa

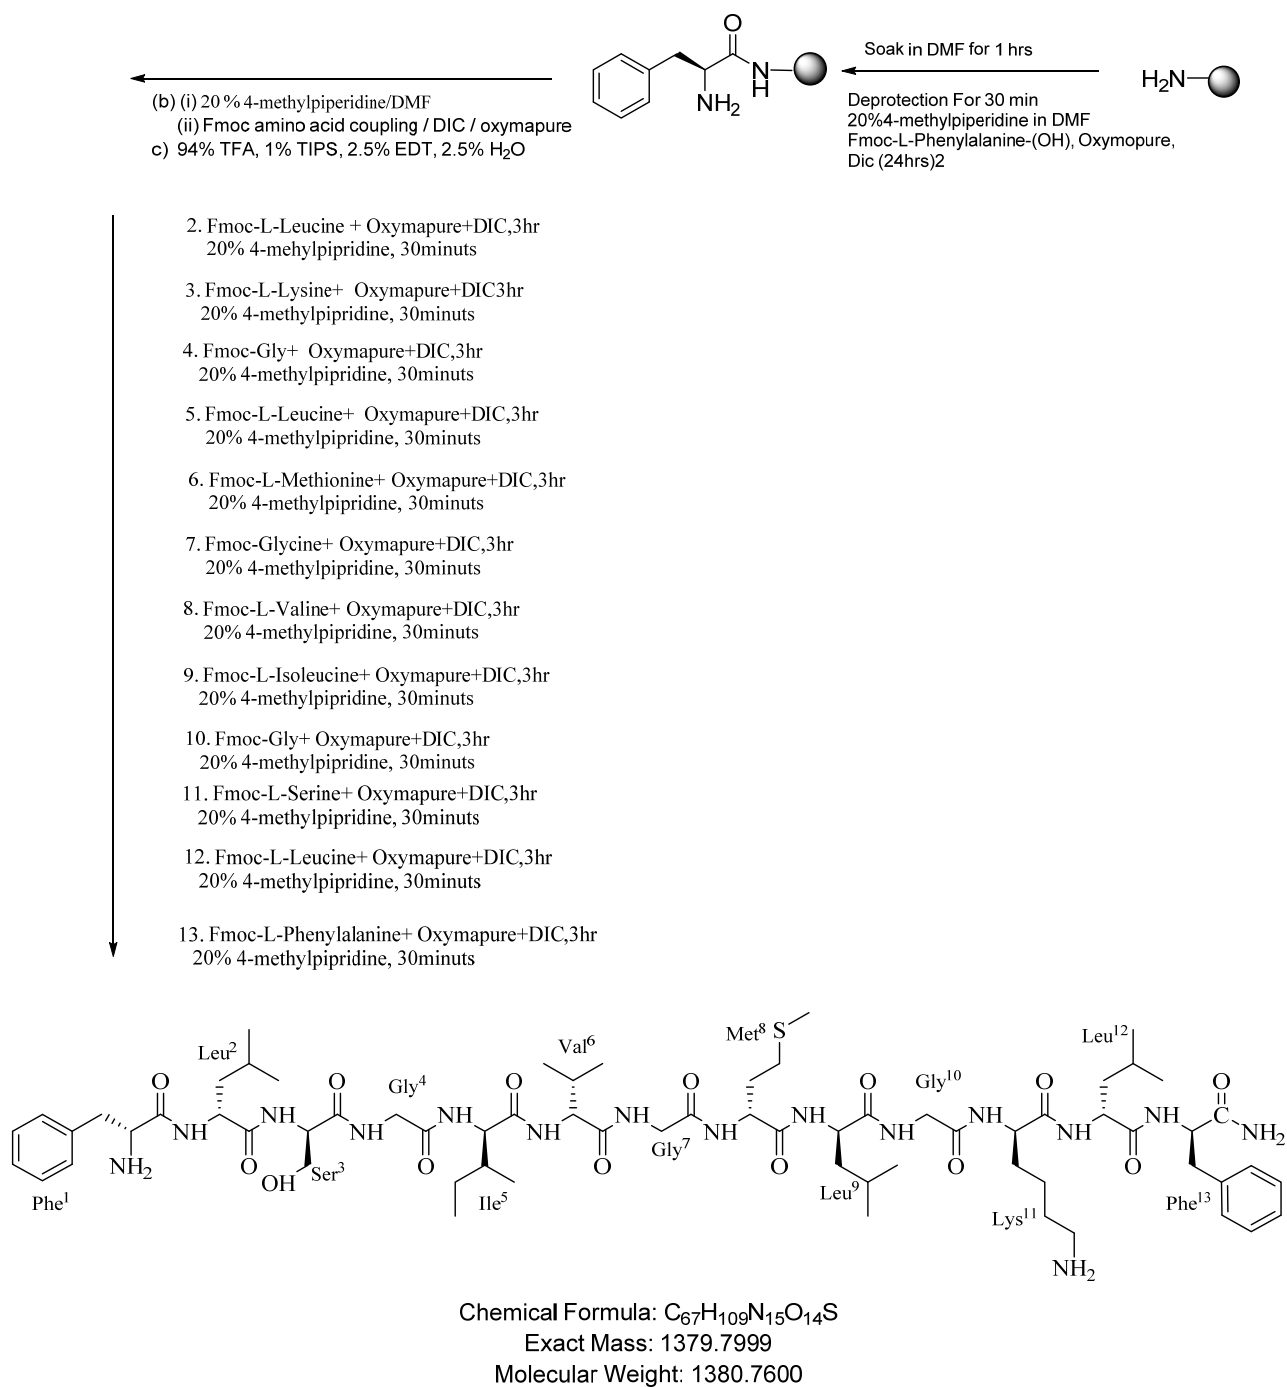

**Figure S4. Synthetic scheme of Temporin-SHa**

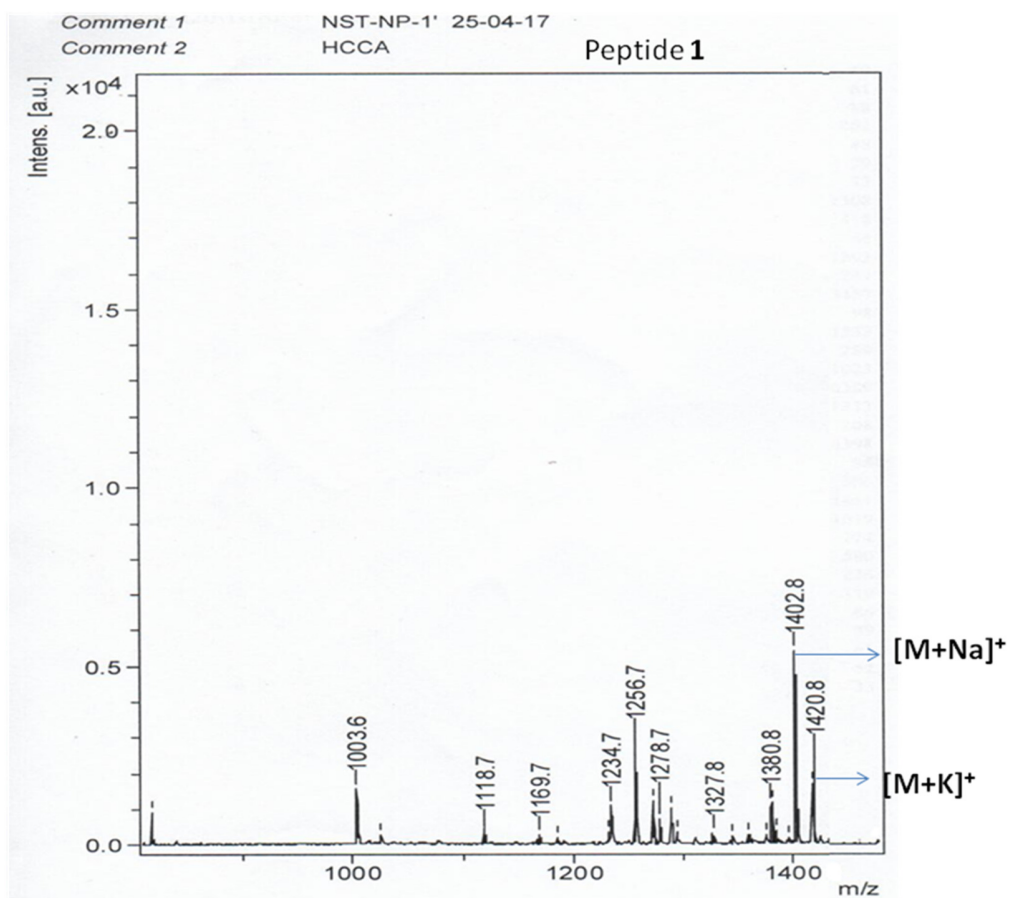

Figure S5. MALDI mass spectra of Temporin-SHa

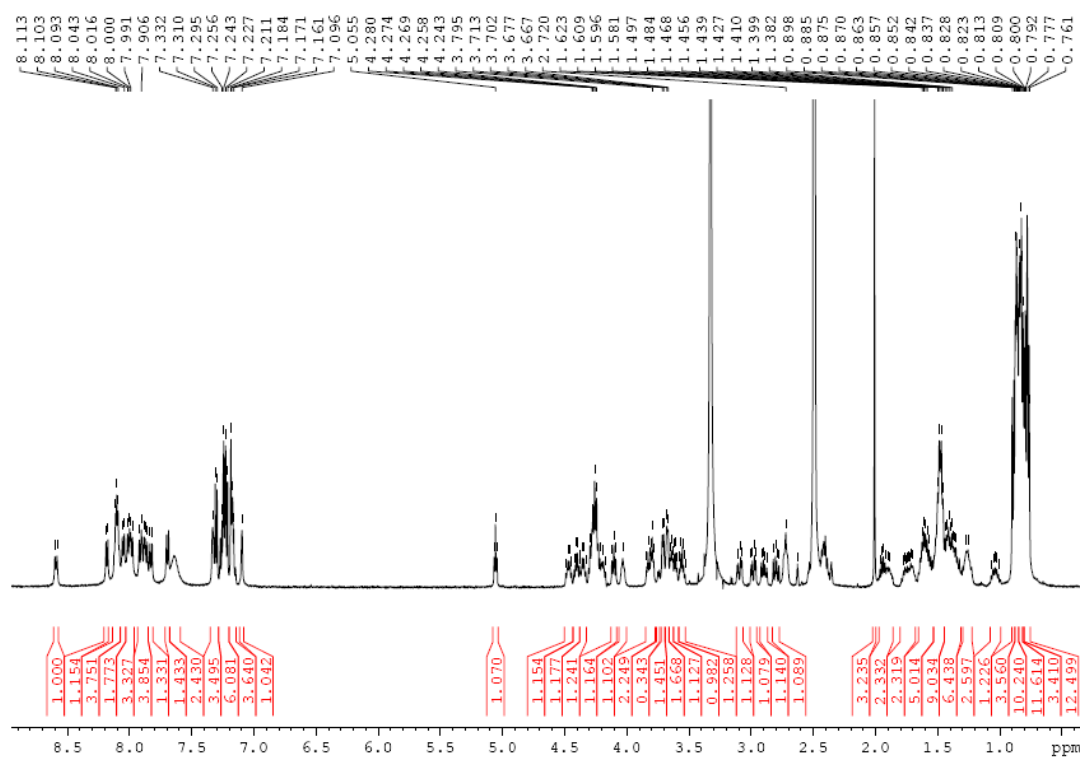

Figure S6. NMR Spectra of Temporin-SHa

| Residue           | Position                       | Temporin-SHa       |                        |                     |
|-------------------|--------------------------------|--------------------|------------------------|---------------------|
|                   |                                | <sup>1</sup> H-NMR | <i>J</i> (Hz)          | <sup>13</sup> C-NMR |
| Phe <sup>1</sup>  |                                | 4.04 s             |                        | 53.4                |
|                   |                                | 2.88 dd, 3.09 dd   | 8.2, 14.2 & 4.38, 14.1 | 37.1                |
|                   |                                |                    |                        | 134.9               |
|                   | 2-6                            | (7.17-7.18)m       |                        | 126.2-129.5         |
| *Leu <sup>2</sup> | CO                             |                    |                        | 167.7               |
|                   | NH <sub>2</sub>                | overlapped         |                        |                     |
|                   |                                | 4.46 dd            | 8.5, 14.0              | 51.0                |
|                   |                                | (1.35-1.49) m      |                        | 41.0                |
|                   |                                | (1.62-1.38) m      |                        | 24.1                |
|                   | δ <sub>1</sub> CH <sub>3</sub> | (0.75-0.80) m      |                        | 21.5                |
|                   | δ <sub>2</sub> CH <sub>3</sub> | (0.80-0.90) m      |                        | 23.1                |
|                   | CO                             |                    |                        | 169.                |
| Ser <sup>3</sup>  | NH                             | 8.61 d             | 8.0                    |                     |
|                   | CH                             | 4.27 m             |                        | 55.2                |
|                   | CH <sub>2</sub>                | 3.61p, 3.55p       | 5.5, 5.6               | 61.8                |
|                   | CO                             |                    |                        | 171.18              |
|                   | NH                             | 8.18 d             | 7.4                    |                     |
| *Gly <sup>4</sup> | OH                             | 5.06t              | 5.5                    |                     |
|                   |                                | 3.82m, 3.67m       |                        | 42.0-41.8           |
|                   | CO                             |                    |                        | 171.2               |
|                   | NH                             | 8.11 m             |                        |                     |
| Ile <sup>5</sup>  |                                | 4.24 m             |                        | 56.7                |
|                   |                                | 1.48* m            |                        | 26.7                |
|                   |                                | 1.69 m             |                        | 36.5                |
|                   | δ <sub>1</sub>                 | 0.79 m             |                        | 14.7                |
|                   | δ <sub>2</sub>                 | 0.76 m             |                        | 10.9                |
|                   | CO                             |                    |                        | 168.2               |
|                   | NH                             | 7.83 d             | 8.5                    |                     |
| Val <sup>6</sup>  |                                | 4.10 t             | 7.5                    | 58.0                |
|                   |                                | 1.93 m             |                        | 30.3                |
|                   |                                | (0.80-0.82) m      |                        | 18.4, 19.1          |
|                   | CO                             |                    |                        | 170.6               |
|                   | NH                             | 7.88 m             |                        |                     |
| Gly <sup>7</sup>  |                                | 3.82m, 3.67m       |                        | 42.0-41.8           |
|                   | CO                             |                    |                        |                     |
| Met <sup>8</sup>  | NH                             | 8.1 m              |                        |                     |
|                   |                                | 4.37 m             |                        | 52.0                |



|                    |                            |                  |                        |             |
|--------------------|----------------------------|------------------|------------------------|-------------|
|                    |                            | 2.39 m           |                        | 29.4        |
|                    |                            | (1.61-1.47) m    |                        | 31.6        |
|                    | $\delta$                   | 1.99 s           |                        | 15.3        |
|                    | CO                         |                  |                        | 171.1       |
|                    | NH                         | 7.98 m           |                        |             |
| *Leu <sup>9</sup>  |                            | 4.25 m           |                        | 51.3        |
|                    |                            | (1.35-1.49) m    |                        | 40.3        |
|                    |                            | (1.62-1.38) m    |                        | 24.1        |
|                    | $\delta_1$ CH <sub>3</sub> | (0.75-0.80) m    |                        | 21.5        |
|                    | $\delta_2$ CH <sub>3</sub> | (0.80-0.90) m    |                        | 23.1        |
|                    | CO                         |                  |                        | 171.1       |
|                    | NH                         | 8.09 m           |                        |             |
| Gly <sup>10</sup>  |                            | 3.82m, 3.67m     |                        | 42.0-41.8   |
|                    | CO                         |                  |                        | 168.9       |
|                    | NH                         | 8.10 m           |                        |             |
| Lys <sup>11</sup>  |                            | 4.23 dd          | 8.5, 13.5              | 51.9        |
|                    |                            | (1.40-1.47) m    |                        | 32.0        |
|                    |                            | 1.24 m           |                        | 22.1        |
|                    |                            | 1.50 m           |                        | 26.6        |
|                    |                            | 2.71 m           |                        | 39.0        |
|                    | CO                         |                  |                        | 167.6       |
|                    | NH                         | 8.06 d           | 7.6                    |             |
|                    | NH <sub>2</sub>            | overlapped       |                        | bs          |
| *Leu <sup>12</sup> |                            | 4.22 m           |                        | 51.1        |
|                    |                            | (1.35-1.49) m    |                        | 40.6        |
|                    |                            | (1.62-1.38) m    |                        | 24.1        |
|                    | $\delta_1$ CH <sub>3</sub> | (0.75-0.80) m    |                        | 21.5        |
|                    | $\delta_2$ CH <sub>3</sub> | (0.80-0.90) m    |                        | 23.1        |
|                    | CO                         |                  |                        | 171.07      |
|                    | NH                         | 7.98 m           |                        |             |
| Phe <sup>13</sup>  |                            | 4.42 seq         | 5.5, 8.5               | 53.1        |
|                    |                            | 2.80 dd, 2.99 dd | 8.04, 14.1 & 8.7, 13.7 | 37.6        |
|                    |                            |                  |                        | 137.7       |
|                    | 2-6                        | (7.22-7.25) m    |                        | 126.2-129.5 |
|                    | CO                         |                  |                        | 170.70      |
|                    | NH                         | 7.70 d           | 8.1                    |             |
|                    | NH <sub>2</sub>            | 7.64             | bs                     |             |

Table S7. NMR data of Temporin-SHa in DMSO-*d*<sub>6</sub> (  $\delta$  in ppm, *J* in Hz)

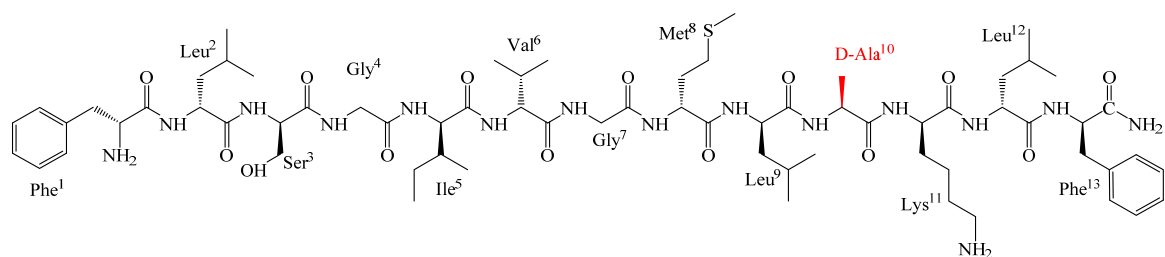

**FigureS8:** Structure of [G10a]-SHa.

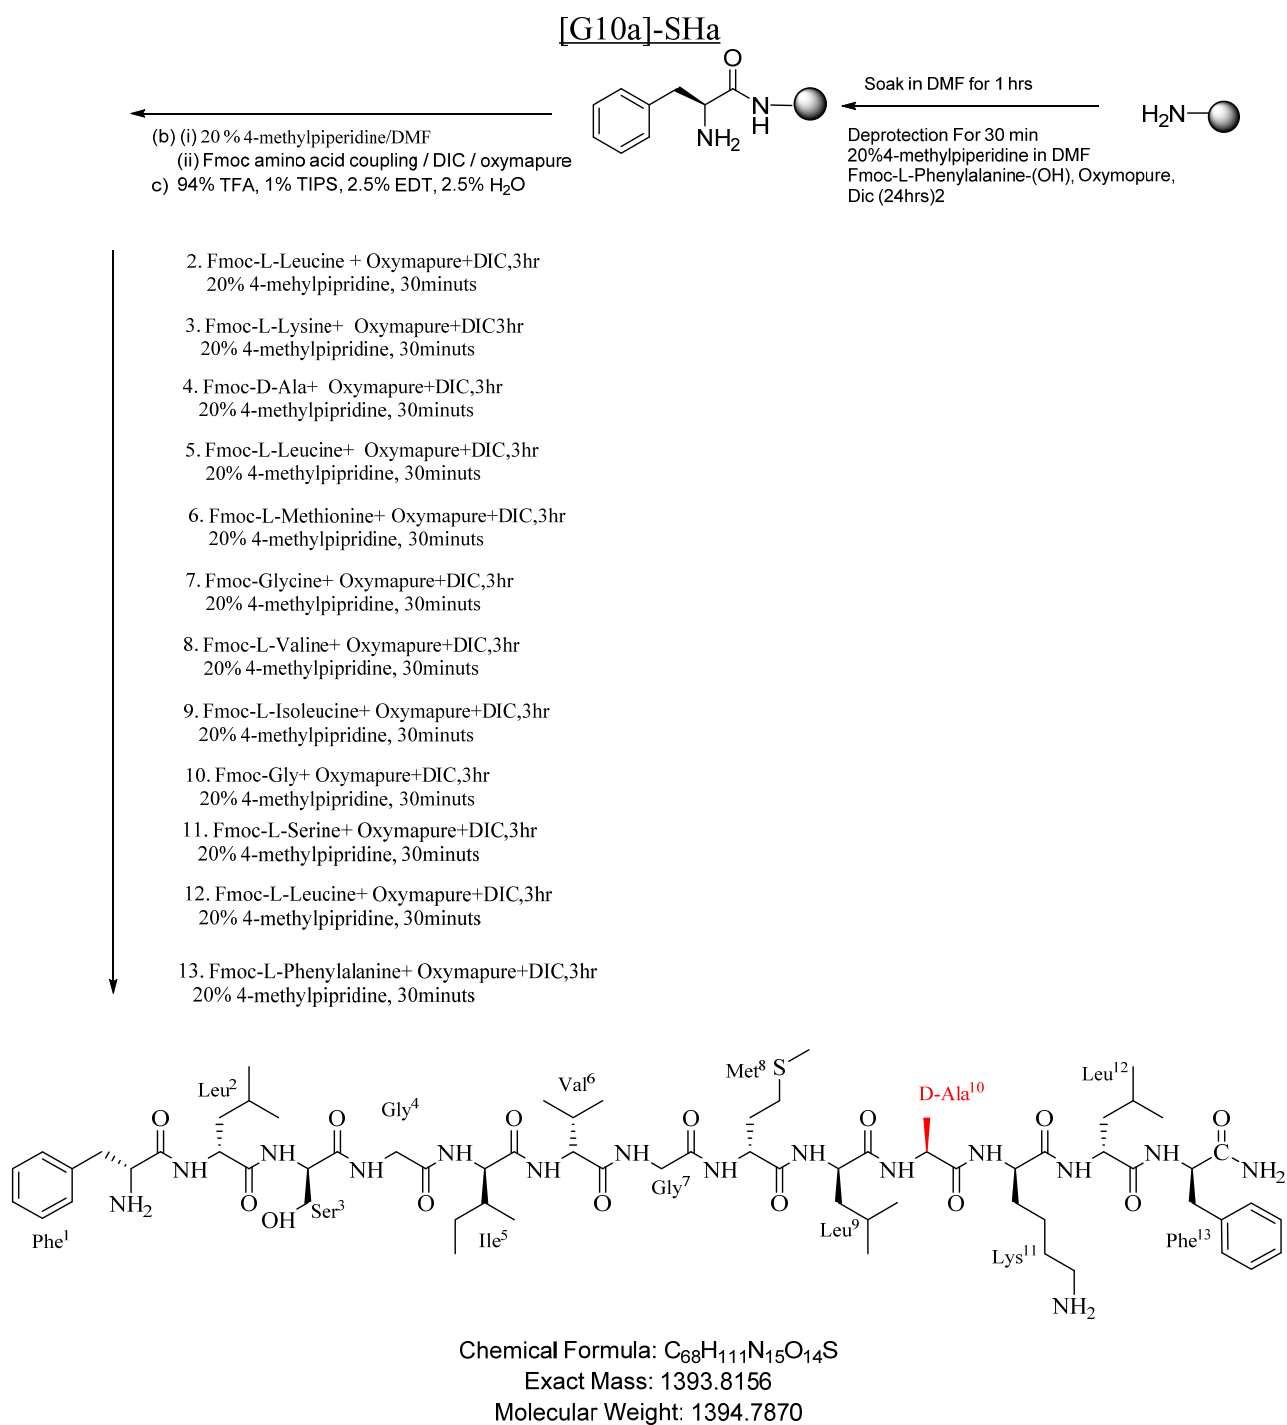

**Figure S9. Synthetic scheme of [G10a]-SHa**

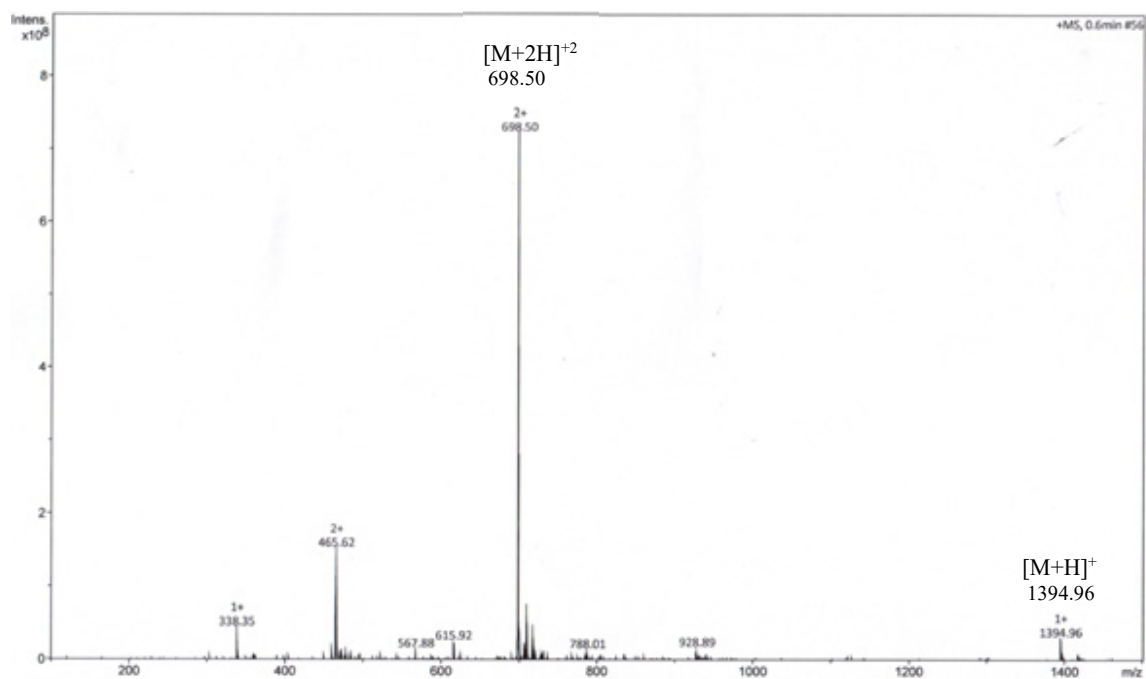

Figure S10: ESIMS (Low Resolution Positive Mode) of [G10a]-SHa

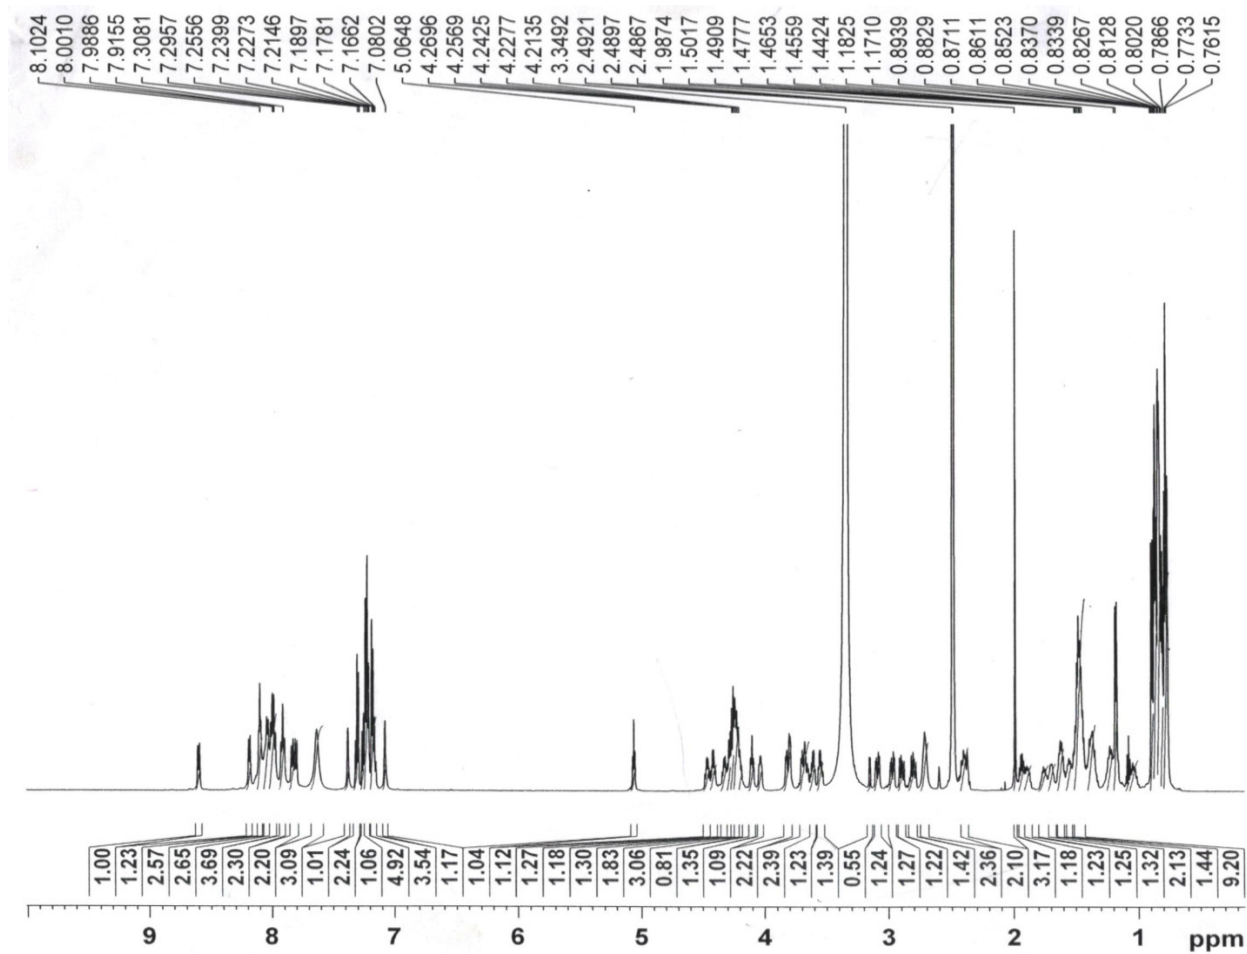

Figure S11:  $^1\text{H}$ -NMR of [G10a]-SHa

| Residue          | Position | [G10a] SHa                   |                        |                                 |
|------------------|----------|------------------------------|------------------------|---------------------------------|
|                  |          | 600 MHz<br>$^1\text{H}$ -NMR | $J$ (Hz)               | 150 MHz<br>$^{13}\text{C}$ -NMR |
| Phe <sup>1</sup> |          | 4.04                         |                        | 53.20                           |
|                  |          | 2.87 dd,, 3.07 dd            | 8.2, 14.2 & 4.38, 14.1 | 37.00                           |
|                  |          |                              |                        | 134.7                           |
|                  | 2-6      | (7.17-7.18) m                |                        | 129.2                           |
|                  | CO       |                              |                        | 167.7                           |

|                   |                                |                |            |            |
|-------------------|--------------------------------|----------------|------------|------------|
|                   | NH <sub>2</sub>                |                |            |            |
| *Leu <sup>2</sup> |                                | 4.46 dd        | 8.22, 14.3 | 51.0       |
|                   |                                | (1.43-1.55) m  |            | 41.0       |
|                   |                                | (1.61-1.04) m  |            | 24.2       |
|                   | δ <sub>1</sub> CH <sub>3</sub> | (0.75-0.80) m  |            | 21.5,      |
|                   | δ <sub>2</sub> CH <sub>3</sub> | (0.80-0.90) m  |            | 23.0       |
|                   | CO                             |                |            | 169.       |
|                   | NH                             | 8.6 d          | 9.3        |            |
| Ser <sup>3</sup>  | CH                             | 4.26 m         |            | 55.1       |
|                   | CH <sub>2</sub>                | 3.60 p, 3.54 p | 5.5, 5.5   | 61.5       |
|                   | CO                             |                |            | 171.18     |
|                   | NH                             | 8.00 m         |            |            |
|                   | OH                             | 5.06 t         | 5.4        |            |
| Gly <sup>4</sup>  |                                | 3.82 m, 3.68 m |            | 42.1       |
|                   | CO                             |                |            | 171.2      |
|                   | NH                             | 8.11 m         |            |            |
| Ile <sup>5</sup>  |                                | 4.24 m         |            | 56.7       |
|                   |                                | 1.45* m        |            | 26.6       |
|                   |                                | 1.69 m         |            | 36.5       |
|                   | δ <sub>1</sub>                 | 0.79 m         |            | 14.6       |
|                   | δ <sub>2</sub>                 | 0.76 m         |            | 10.9       |
|                   | CO                             |                |            | 168.2      |
|                   | NH                             | 7.84 d         | 8.4        |            |
| Val <sup>6</sup>  |                                | 4.10 t         | 7.5        | 58.0       |
|                   |                                | 1.93 m         |            | 30.2       |
|                   |                                | (0.80-0.82) m  |            | 18.9, 19.2 |
|                   | CO                             |                |            | 170.6      |
|                   | NH                             | 7.90 m         |            |            |

|                   |                                |                |     |        |
|-------------------|--------------------------------|----------------|-----|--------|
| Gly <sup>7</sup>  |                                | 3.67 m, 3.80 m |     | 41.9   |
|                   | CO                             |                |     | 168.9  |
|                   | NH                             | 7.90 m         |     |        |
| Met <sup>8</sup>  |                                | 4.32 (m)       |     | 52.0   |
|                   |                                | 2.39 m         |     | 29.4   |
|                   |                                | (1.75-1.85)m   |     | 31.8   |
|                   | δ                              | 1.97 m         |     | 15.3   |
|                   | CO                             |                |     | 171.1  |
|                   | NH                             | 8.19 d         | 7.3 |        |
| *Leu <sup>9</sup> |                                | 4.21 m         |     | 51.35  |
|                   |                                | (1.43-1.55) m  |     | 40.6   |
|                   |                                | (1.61-1.04) m  |     | 24.0   |
|                   | δ <sub>1</sub> CH <sub>3</sub> | (0.75-0.80) m  |     | 21.6   |
|                   | δ <sub>2</sub> CH <sub>3</sub> | (0.80-0.90) m  |     | 22.9   |
|                   | CO                             |                |     | 171.1  |
|                   | NH                             | 8.0 m          |     |        |
| Ala <sup>10</sup> |                                | 4.25 m         |     | 48.31  |
|                   |                                | 1.18 d         | 6.9 | 18.42  |
|                   | CO                             |                |     | 171.18 |
|                   | NH                             | 7.92 m         |     |        |
| Lys <sup>11</sup> |                                | 4.26m          |     | 51.1   |
|                   |                                | (1.40-1.47)m   |     | 31.30  |
|                   |                                | 1.22 m         |     | 22.17  |
|                   |                                | 1.50 m         |     | 26.64  |
|                   |                                | 2.71 m         |     | 38.79  |
|                   | CO                             |                |     | 167.6  |
|                   | NH                             | 7.99 m         |     |        |
|                   | NH <sub>2</sub>                |                |     | bs     |

|                    |                                |                 |                        |             |
|--------------------|--------------------------------|-----------------|------------------------|-------------|
| *Leu <sup>12</sup> |                                | 4.22 m          |                        | 51.4        |
|                    |                                | (1.43-1.55) m   |                        | 40.4        |
|                    |                                | (1.61-1.04) m   |                        | 24.0        |
|                    | δ <sub>1</sub> CH <sub>3</sub> | (0.75-0.80) m   |                        | 21.5        |
|                    | δ <sub>2</sub> CH <sub>3</sub> | (0.80-0.90) m   |                        | 23.2        |
|                    | CO                             |                 |                        | 171.07      |
|                    | NH                             | 8.07 m          |                        |             |
| Phe <sup>13</sup>  |                                | 4.40 dd         | 8.3, 13.5              | 53.5        |
|                    |                                | 2.78dd , 2.96dd | 8.04, 14.1 & 8.7, 13.7 | 37.6        |
|                    |                                |                 |                        | 137.6       |
|                    | 2-6                            | 7.22-7.25m      |                        | 127.1-128.0 |
|                    | CO                             |                 |                        | 170.70      |
|                    | NH                             | 7.81 d          | 8.4                    |             |
|                    | NH <sub>2</sub>                |                 |                        |             |

---

**Figure S12:** NMR Data of [G10a] SHa in *d*<sub>6</sub> DMSO.



[G10a]<sub>2</sub>-SHa

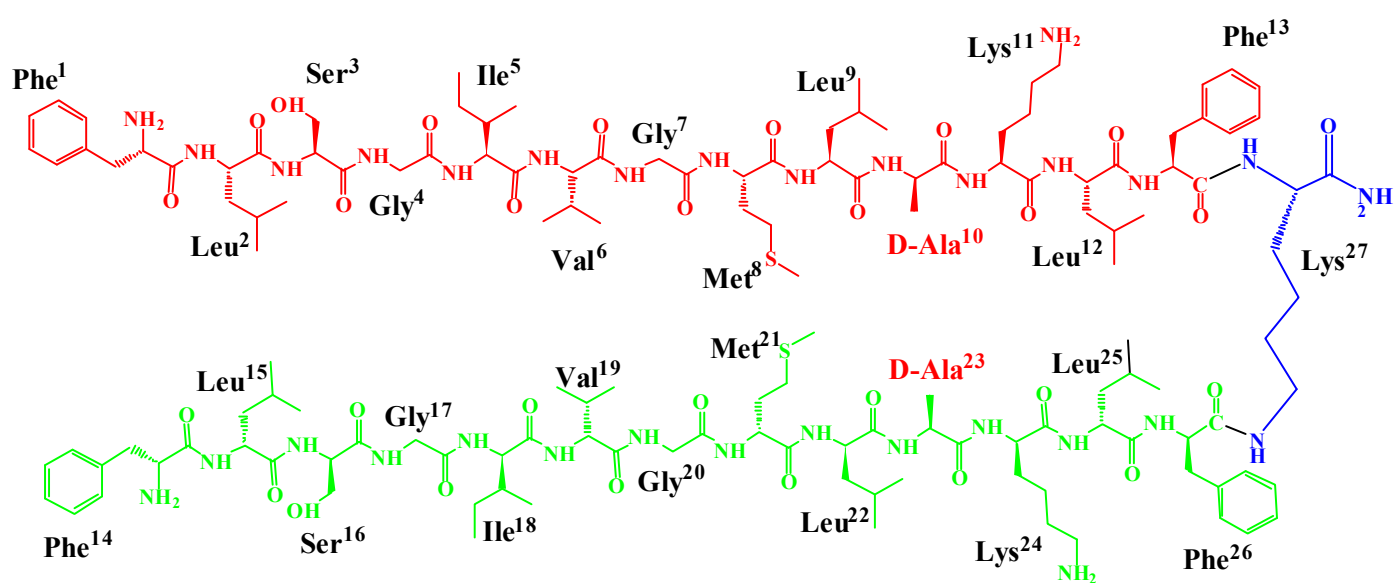

FigureS13: Structure of [G10a]<sub>2</sub>-SHa.

## [G10a]<sub>2</sub>-SHa

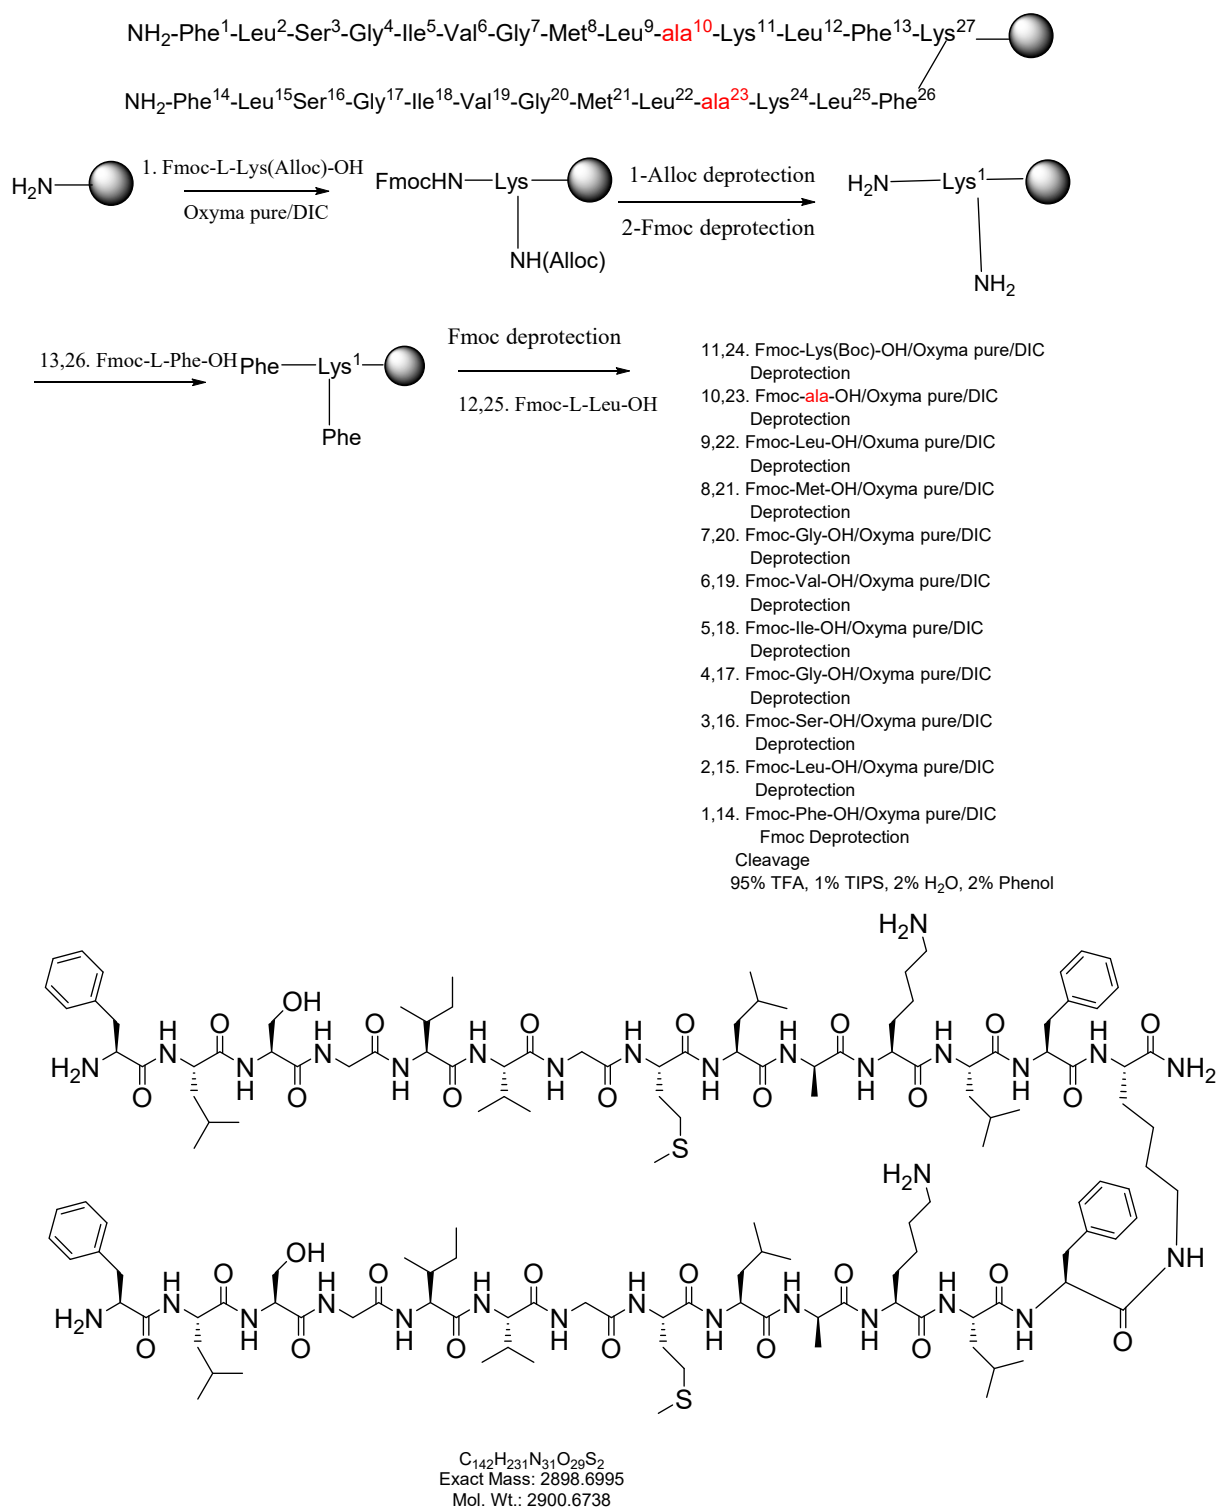

**Figure S14. Synthetic scheme of [G10a]<sub>2</sub>SHa**

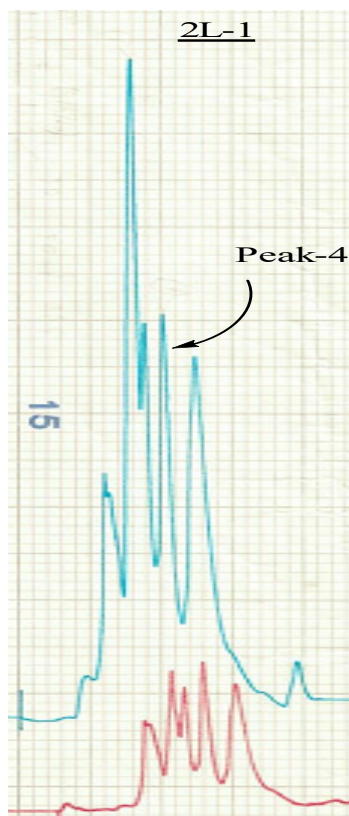

Figure S15: HPLC profile of [G10a]<sub>2</sub>-SHa

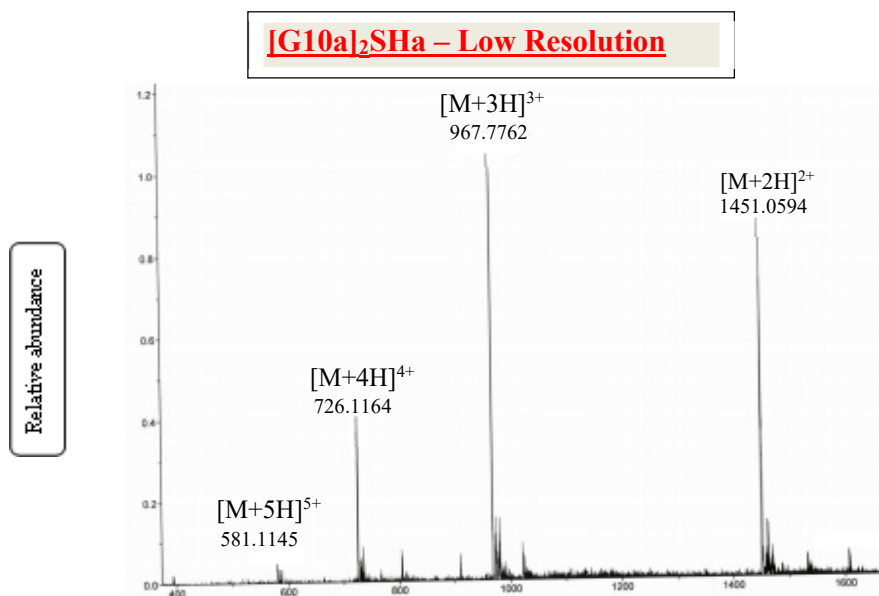

Figure S16: ESIMS (Low Resolution Positive Mode) of [G10a]<sub>2</sub>SHa

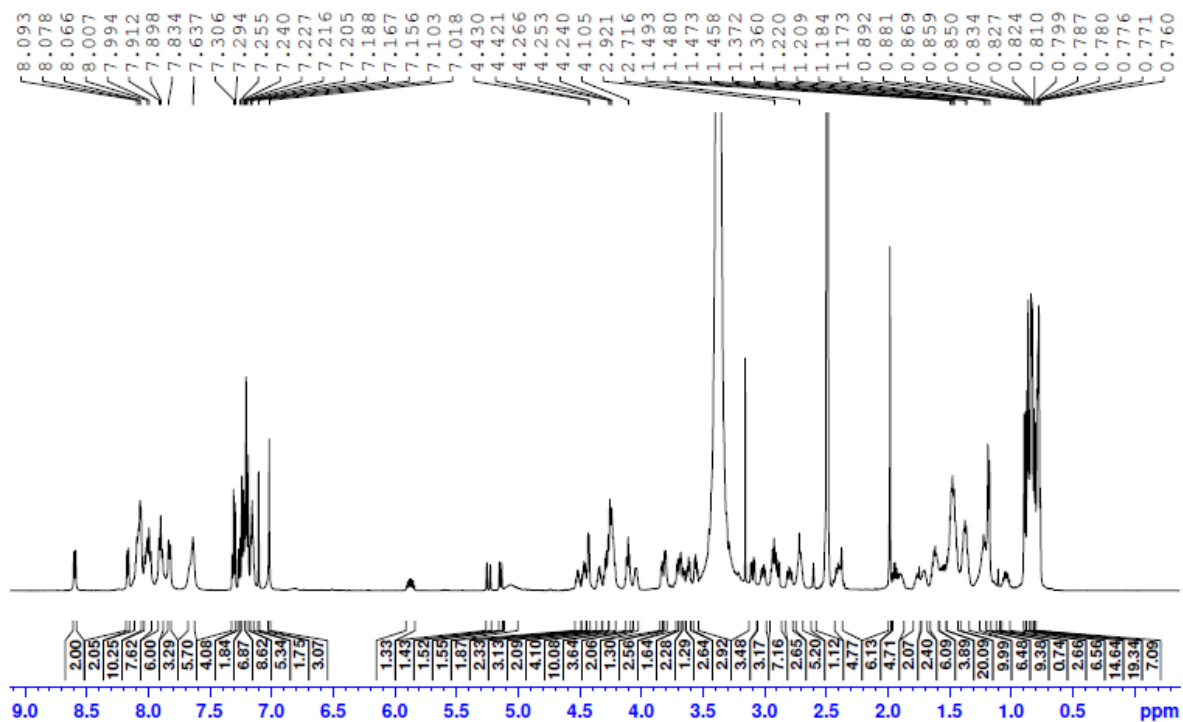

Figure S17:  $^1\text{H}$ -NMR of  $[\text{G10a}]_2\text{SHa}$

## Jeff-[G10a]<sub>2</sub>-SHa

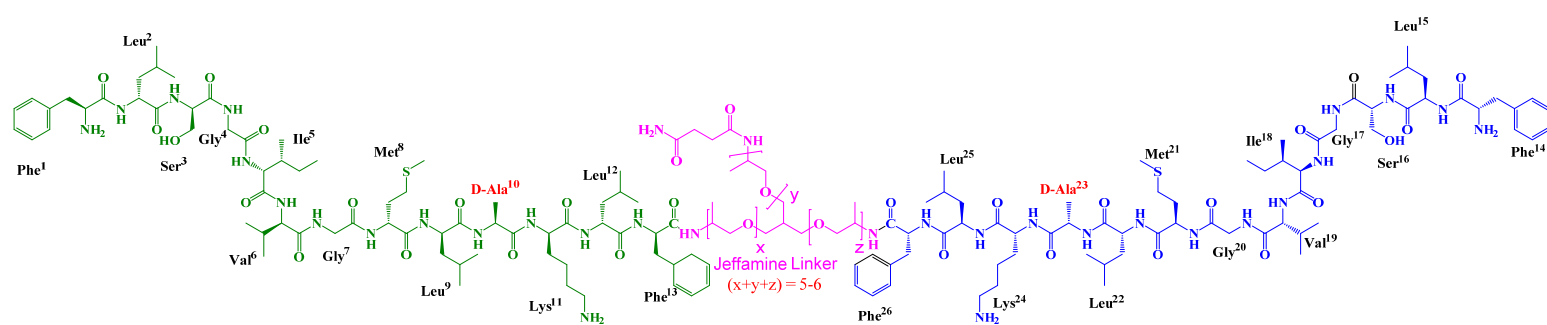

**Figure S18:** Structure of Jeff-[G10a]<sub>2</sub>-SHa

## JEFF-[G10a]<sub>2</sub>-SHa

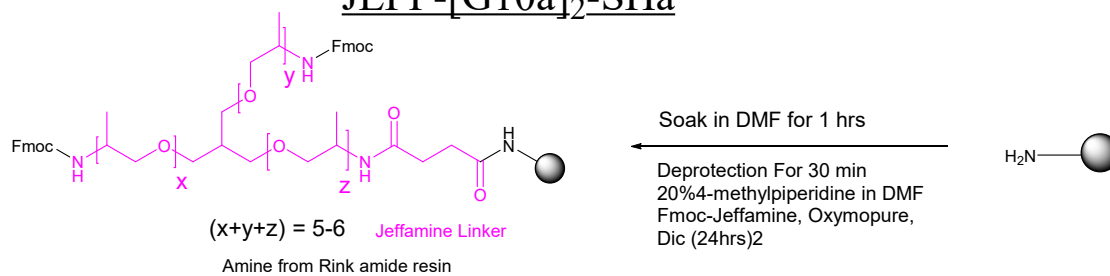

- 13,26. Fmoc-L-Phe + Oxymopure+DIC,3hr  
20% 4-methylpiperidine, 30minuts
- 12,25. Fmoc-L-Leucine + Oxymopure+DIC,3hr  
20% 4-methylpiperidine, 30minuts
- 11,24. Fmoc-L-Lysine+ Oxymopure+DIC,3hr  
20% 4-methylpiperidine, 30minuts
- 10,23. Fmoc-D-Ala+ Oxymopure+DIC,3hr  
20% 4-methylpiperidine, 30minuts
- 9,22. Fmoc-L-Leucine+ Oxymopure+DIC,3hr  
20% 4-methylpiperidine, 30minuts
- 8,21. Fmoc-L-Methionine+ Oxymopure+DIC,3hr  
20% 4-methylpiperidine, 30minuts
- 7,20. Fmoc-Glycine+ Oxymopure+DIC,3hr  
20% 4-methylpiperidine, 30minuts
- 6,19. Fmoc-L-Valine+ Oxymopure+DIC,3hr  
20% 4-methylpiperidine, 30minuts
- 5,18 Fmoc-L-Isoleucine+ Oxymopure+DIC,3hr  
20% 4-methylpiperidine, 30minuts
- 4,17. Fmoc-Gly+ Oxymopure+DIC,3hr  
20% 4-methylpiperidine, 30minuts
- 3,16. Fmoc-L-Serine+ Oxymopure+DIC,3hr  
20% 4-methylpiperidine, 30minuts
- 2,15 Fmoc-L-Leucine+ Oxymopure+DIC,3hr  
20% 4-methylpiperidine, 30minuts
- 1,14. Fmoc-L-Phenylalanine+ Oxymopure+DIC,3hr  
20% 4-methylpiperidine, 30minuts

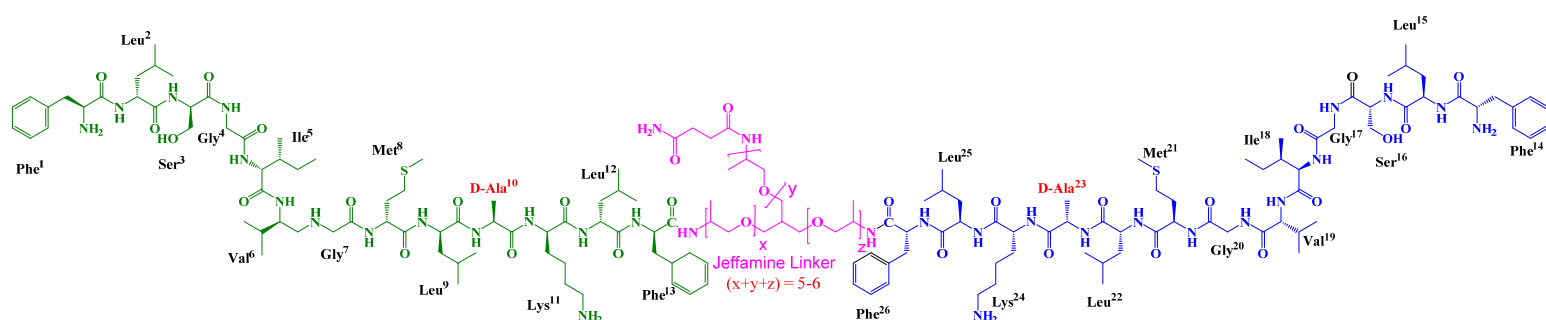

Figure S19. Synthetic scheme of Jeff-[G10a]<sub>2</sub>SHa

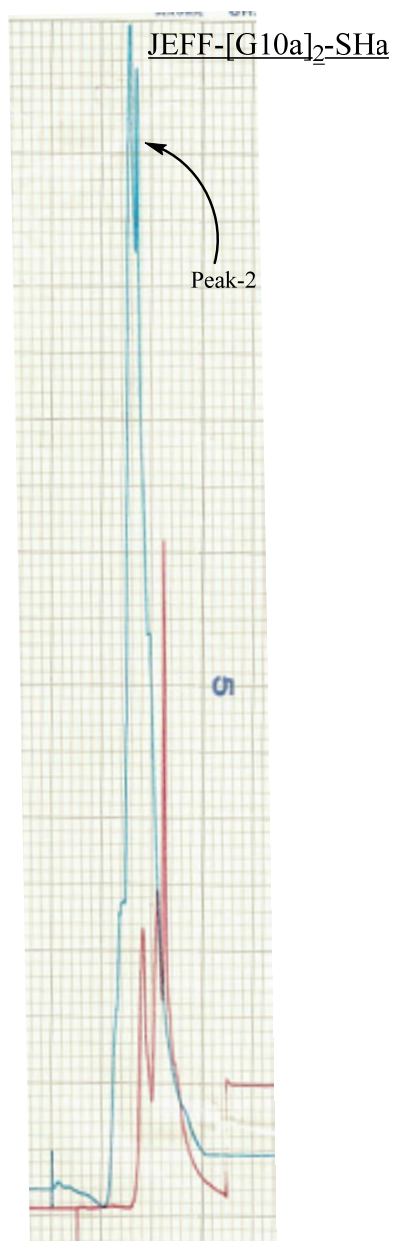

Figure S20: HPLC profile of JEFF-[G10a]<sub>2</sub>SHa

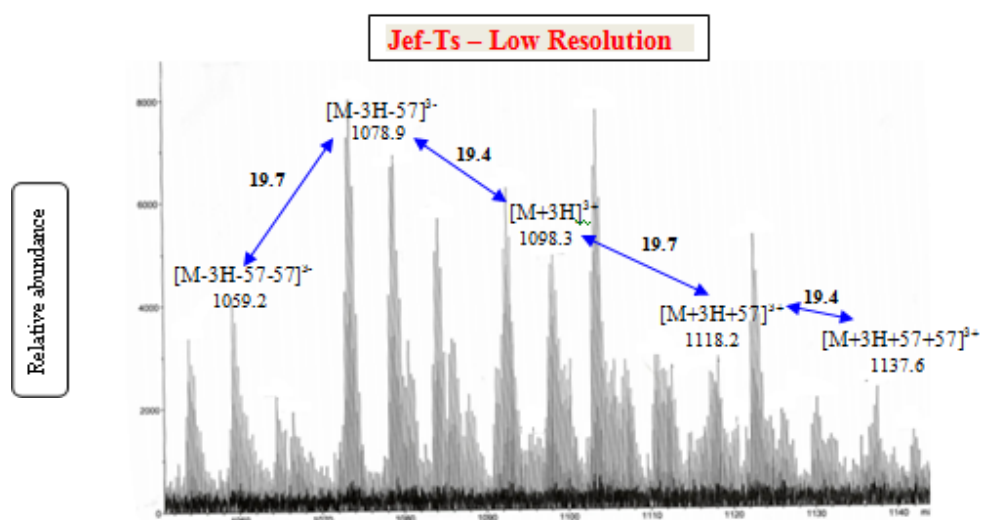

Figure S21: ESIMS (Low Resolution Positive Mode) of Jeff-[G10a]<sub>2</sub>SHa



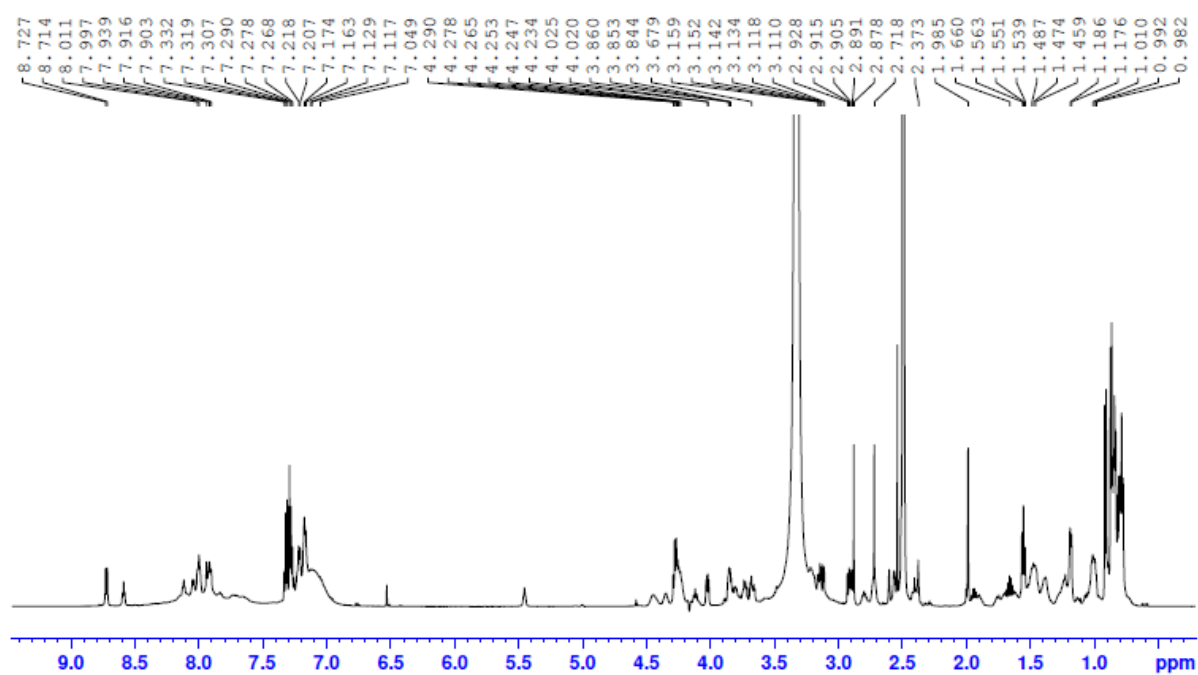

Figure S22:  $^1\text{H}$ -NMR of Jeff-[G10a]<sub>2</sub>SHa

# [G10a]<sub>3</sub>-SHa

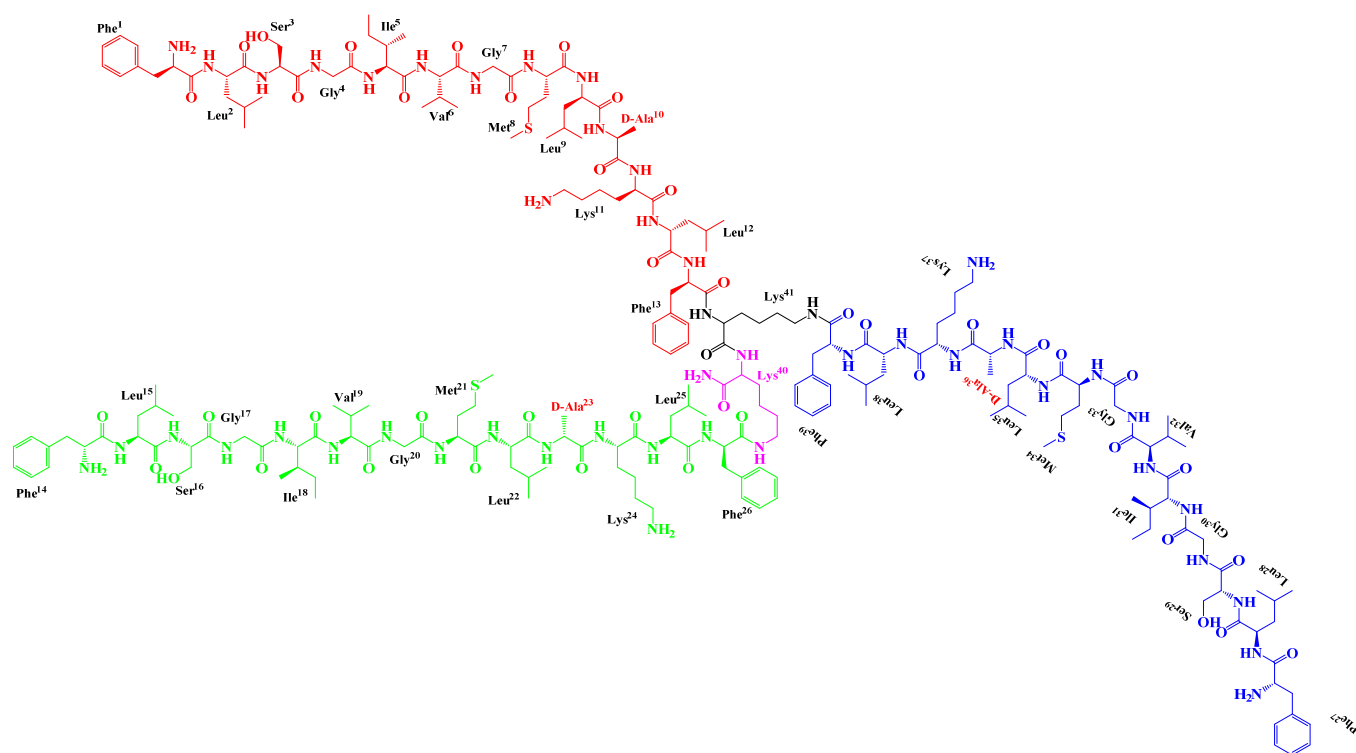

FigureS23: Structure of [G10a]<sub>3</sub>-SHa

## [G10a]<sub>3</sub>-SHa

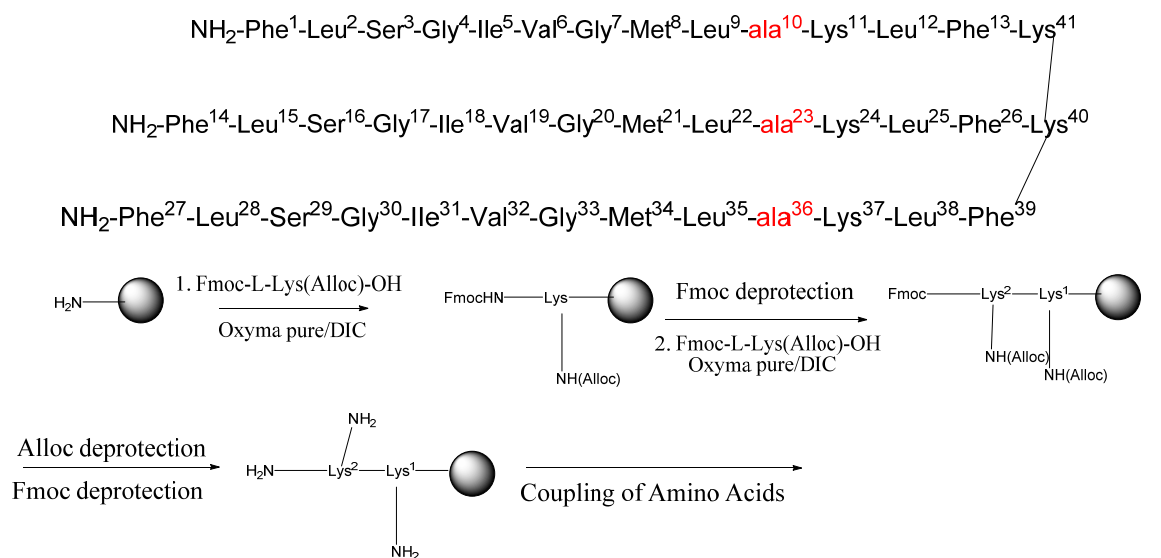

- 13, 26, 39 Fmoc-Phe-OH/Oxyma pure/DIC Deprotection
- 12, 25, 38 Fmoc-Leu-OH/Oxyma pure/DIC Deprotection
- 11, 24, 37 Fmoc-Lys(Alloc)-OH/Oxyma pure/DIC Deprotection
- 10, 23, 36 Fmoc-**ala**-OH/Oxyma pure/DIC Deprotection
- 9, 22, 35 Fmoc-Leu-OH/Oxyma pure/DIC Deprotection
- 8, 21, 34 Fmoc-Met-OH/Oxyma pure/DIC Deprotection
- 7, 20, 33 Fmoc-Gly-OH/Oxyma pure/DIC Deprotection
- 6, 19, 32 Fmoc-Val-OH/Oxyma pure/DIC Deprotection
- 5, 18, 31 Fmoc-Ile-OH/Oxyma pure/DIC Deprotection
- 4, 17, 30 Fmoc-Gly-OH/Oxyma pure/DIC Deprotection
- 3, 16, 29 Fmoc-Ser-OH/Oxyma pure/DIC Deprotection
- 2, 15, 28 Fmoc-Leu-OH/Oxyma pure/DIC Deprotection
- 1, 14, 27 Fmoc-Phe-OH/Oxyma pure/DIC Fmoc Deprotection
- Cleavage
- 95% TFA, 1% TIPS, 2% H<sub>2</sub>O, 2% Phenol

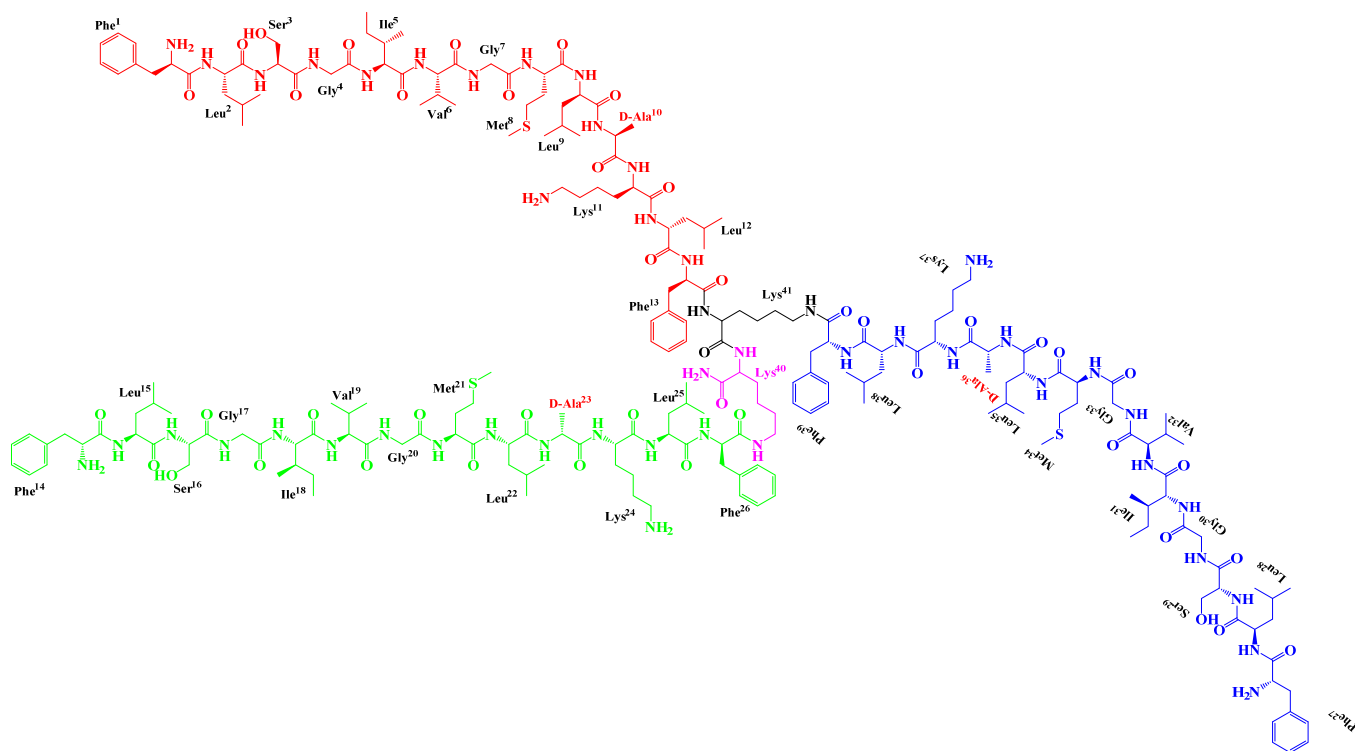

**Figure S24. Synthetic scheme of [G10a]<sub>3</sub>-SHa**

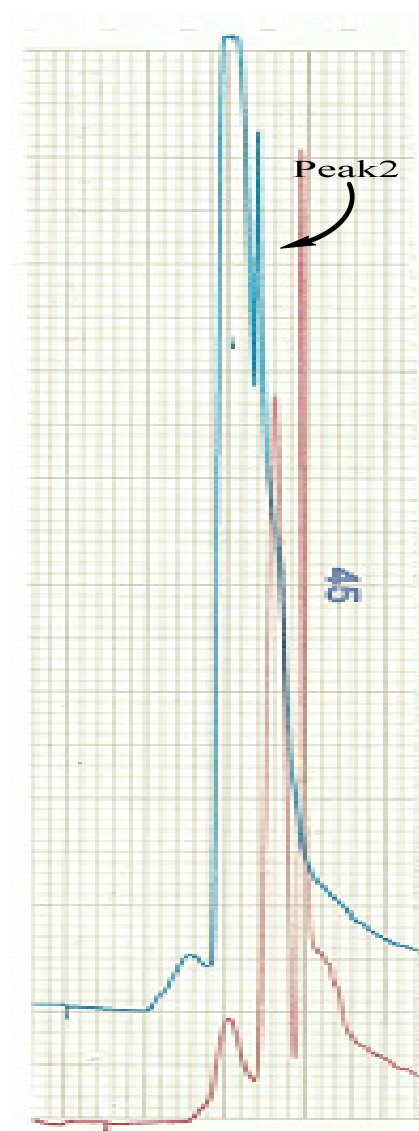

Figure S25: HPLC profile of [G10a]<sub>3</sub>-SHa

**2L-2 – Low Resolution ESI-MS**

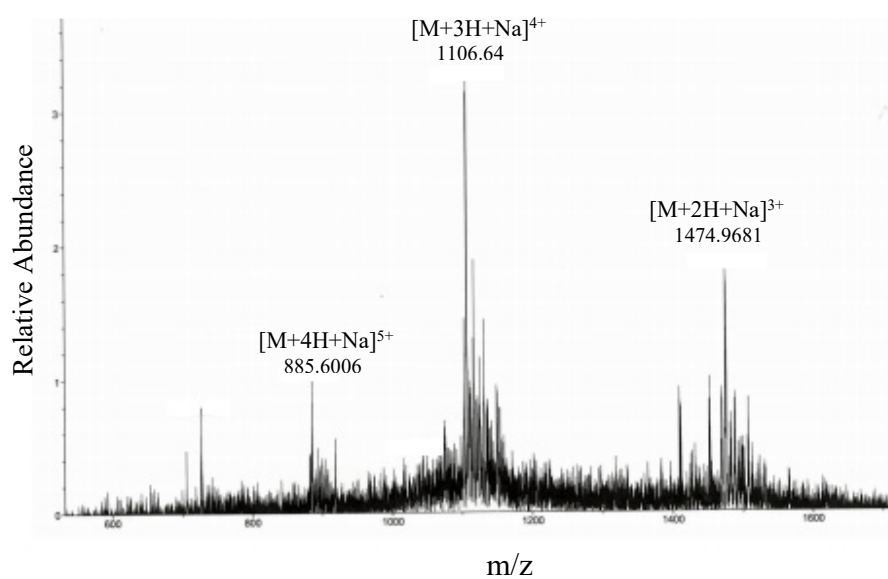

**Figure S26: ESIMS (Low Resolution Positive Mode) of [G10a]<sub>3</sub>-SHa**

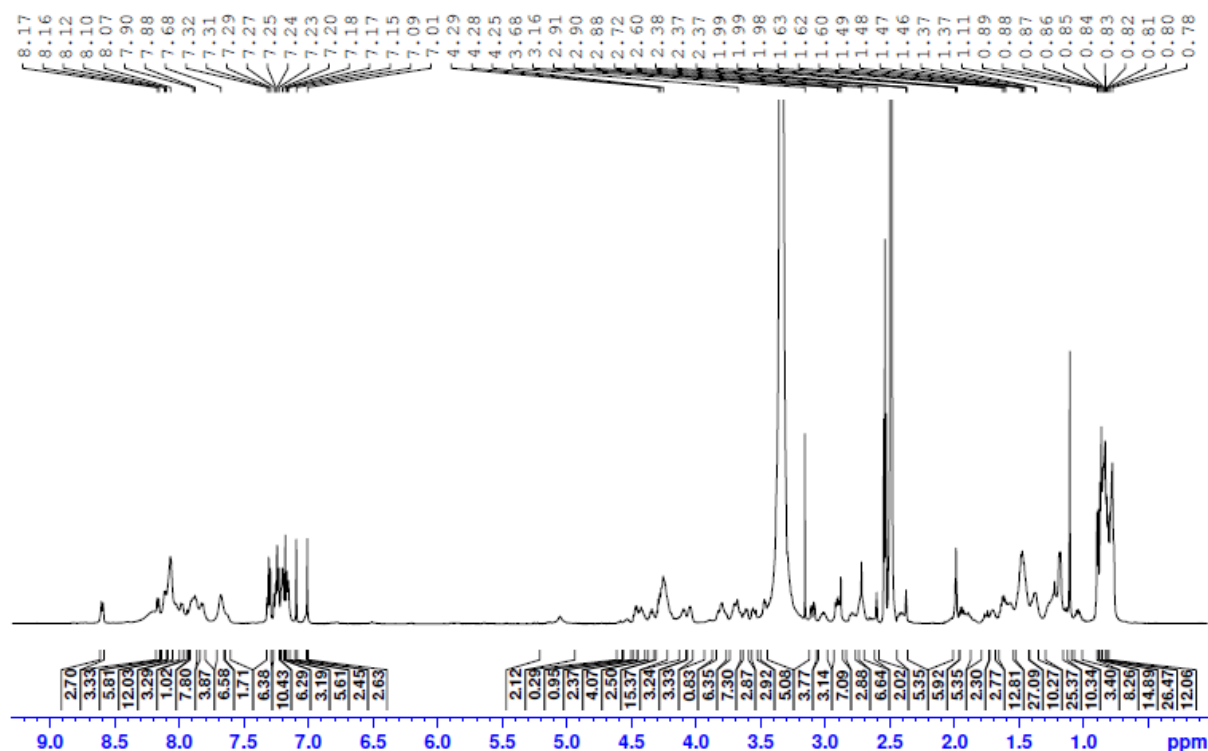

Figure S27:  $^1\text{H}$ -NMR of  $[\text{G10a}]_3\text{-SHa}$

## UV and IR analysis

**[G10a]-SHa:** White amorphous solid, UV (ACN)  $\lambda_{\text{max}}$  ( $\log \epsilon$ ) 218 (1.75); IR (KBr,  $\text{cm}^{-1}$ ) 3777.0 (NH), 3490.0 (OH), 3080.0 ( $=\text{C-H}$ ), 2960.8 (C-H), 1670.1 ( $-\text{NHC=O}$  stretching), 1531.8 (Aromatic  $-\text{C}=\text{C}-$ , CN stretching, NH bending), 1443.7 (C-H bending, Aromatic  $-\text{C}=\text{C}-$  stretching), and 1200.7 and 1136.7 (C-O stretching, CN stretching, NH bending).

**[G10a]<sub>2</sub>-SHa:** White amorphous solid, UV (ACN)  $\lambda_{\text{max}}$  ( $\log \epsilon$ ) 231 (1.176) nm; IR (KBr,  $\text{cm}^{-1}$ ) 3664.3 (NH), 3301.3 (OH), 3087.0 ( $=\text{C-H}$ ), 2960.5 (C-H), 1666.8 ( $-\text{NHC=O}$  stretching), 1535.7 (Aromatic  $-\text{C}=\text{C}-$ , CN stretching, NH bending), 1438.6 (C-H bending, Aromatic  $-\text{C}=\text{C}-$  stretching), and 1202.7 (C-O stretching, CN stretching, NH bending).

**[G10a]<sub>3</sub>-SHa:** Purple amorphous solid, UV (ACN)  $\lambda_{\text{max}}$  (log  $\epsilon$ ) 220 (0.427) nm; IR (KBr,  $\text{cm}^{-1}$ ) 3662.4 (NH), 3296.4 (OH), 3074.0 (=C-H), 2962.1 and 2927.8 (C-H), 1668.6 and 1636.8 (-NHC=O stretching), 1533.9 (Aromatic -C=C-, CN stretching, NH bending), 1438.7 (C-H bending, Aromatic -C=C- stretching), and 1201.2 and 1135.2 (C-O stretching, CN stretching, NH bending).

**Jeff-[G10a]<sub>2</sub>-SHa:** Pale yellow amorphous solid, UV (ACN)  $\lambda_{\text{max}}$  (log  $\epsilon$ ) 229 (0.987) nm; IR (KBr,  $\text{cm}^{-1}$ ) 3661.7 (NH), 3295.8 (OH), 3084.7 (=C-H), 2928.4 (C-H), 1672.6 and 1635.1 (-NHC=O stretching), 1538.8 (Aromatic -C=C-, CN stretching, NH bending), 1437.8 and 1400.6 (C-H bending, Aromatic -C=C- stretching), and 1202.8 (C-O stretching, CN stretching, NH bending).

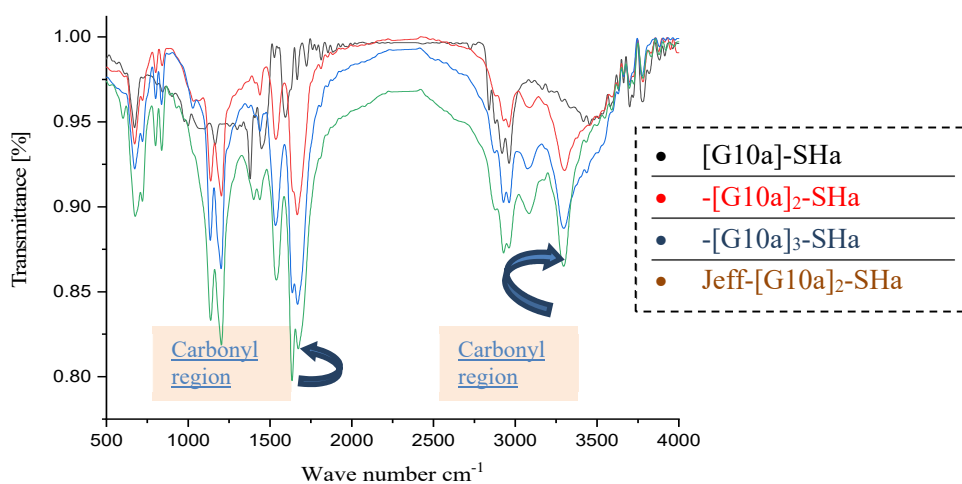

**Figure S28:** IR spectra of dendrimer peptides using KBr disc technique



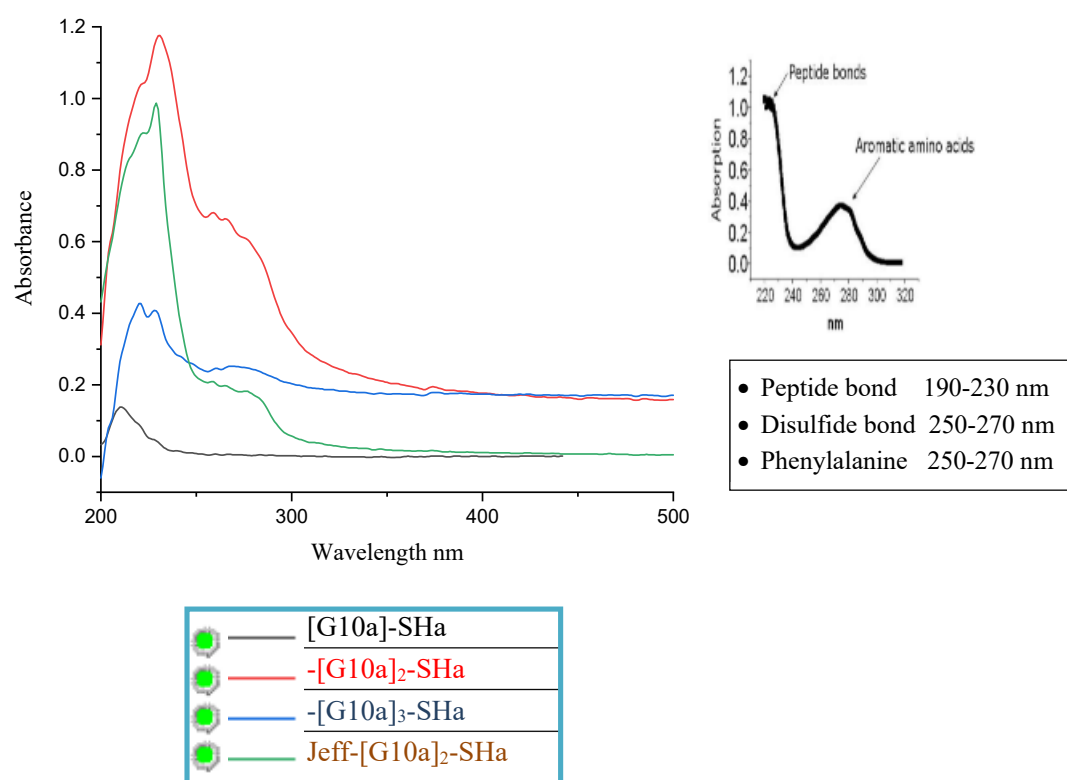

**Figure S29:** UV-Visible spectra of dendrimer peptides showing peptide bond and disulfide bond region
